# Supplementary material for: Validation of a field deployable reactor for in situ formation of NOM-engineered nanoparticle corona
Source: Royal Society of Chemistry journal article supplement (doi:10.1039/c9en01090d), 2020-01-01
Supplement: c9en01090d1.pdf [file c9en01090d1.pdf]

# Field deployable reactors for investigating the interaction of nanoparticles with natural organic matter under field conditions

\* Corresponding author

**Authors:** Narjes Tayyebi Sabet Khomami <sup>a</sup>, Allan Philippe <sup>a\*</sup>, Abd Alaziz Abu Quba <sup>a</sup>, Oliver J. Lechtenfeld <sup>b,c</sup>, Jean-Michel Guigner <sup>d</sup>, Stefan Heissler <sup>e</sup>, Gabriele E. Schaumann <sup>a</sup>

<sup>a</sup> iES Landau, Institute for Environmental Sciences, Fortstrasse 7, 76829 Landau, Germany. <sup>b</sup> UFZ - Helmholtz-Centre for Environmental Research, Department Analytical Chemistry, Research Group BioGeoOmics, 04318 Leipzig, Germany. <sup>c</sup> ProVIS – Centre for Chemical Microscopy, UFZ – Helmholtz-Centre for Environmental Research, 04318 Leipzig, Germany. <sup>d</sup> IMPMC, Sorbonne University, CNRS – UMR 7590, MNHN, Paris, France. <sup>e</sup> Institute of Functional Interfaces IFG, Karlsruhe Institute of Technology KIT, Hermann-von-Helmholtz-Platz 1, D-76344 Eggenstein-Leopoldshafen, Germany.

**Table S1:** Properties of the river water used for the laboratory and field experiments (May-September 2018).

| Date                                 | Conductivity<br>( $\mu\text{S}/\text{cm}$ ) | pH  | DOC (mg/l)                    | Stream flow<br>rate (cm/s) <sup>1</sup> | Temp.<br>C | Dissolved<br>oxygen<br>(mg/l)  |
|--------------------------------------|---------------------------------------------|-----|-------------------------------|-----------------------------------------|------------|--------------------------------|
| Late May                             | 271                                         | 7.2 | 6.1( $\pm$ 0.16) <sup>2</sup> | -                                       | -          | -                              |
| Mid Jun                              | 301                                         | 7.1 | 8.2( $\pm$ 0.42) <sup>2</sup> | -                                       | -          | -                              |
| Mid July                             | 280                                         | 7.1 | 6.1( $\pm$ 0.37) <sup>2</sup> | -                                       | -          | -                              |
| Late July                            | 293                                         | 7.4 | 6.7( $\pm$ 0.21) <sup>2</sup> | -                                       | -          | -                              |
| Late September<br>(field experiment) | 272                                         | 7.2 | 6.5( $\pm$ 0.15) <sup>2</sup> | 32.3( $\pm$ 7.5) <sup>2</sup>           | 21         | 8.79( $\pm$ 1.23) <sup>2</sup> |

<sup>1</sup>One meter from the river bank

<sup>2</sup>Standard deviation

**Table S2:** Total concentration of selected elements in the river water determined using ICP-OES (September 2018). LOD: limit of detection.

| Elements | Concentration (µg/l) | LOD (µg/l) | Standard deviation (%) |
|----------|----------------------|------------|------------------------|
| Al       | 16.5                 | 1          | 1.20                   |
| Ba       | 43.5                 | 0.5        | 3.02                   |
| Ca       | 5246.0               | 1          | 0.35                   |
| Cu       | < LOD                | 0.5        | -                      |
| Fe       | 20.3                 | 1          | 2.80                   |
| Ti       | < LOD                | 0.05       | -                      |
| K        | 509.4                | 2.5        | 0.80                   |
| Mg       | 1030.2               | 0.5        | 0.15                   |
| Mn       | 2.7                  | 0.3        | 0.01                   |
| Na       | 3227.1               | 25         | 0.33                   |
| Sr       | 93.4                 | 0.5        | 0.13                   |
| Zn       | 1.6                  | 0.5        | 6.25                   |

**Table S3:** Anions concentrations of the river water using ion chromatography (September 2018). LOD: limit of detection.

| Anions    | Concentration (mg/l) | LOD (mg/l) | Standard deviation (%) |
|-----------|----------------------|------------|------------------------|
| Fluoride  | 0.04                 | 0.02       | 4.0                    |
| Chloride  | 10.11                | 0.65       | 4.5                    |
| Nitrate   | 4.94                 | 0.67       | 3.0                    |
| Phosphate | 0.148                | 0.08       | 3.5                    |
| Sulphate  | 20.98                | 1.61       | 5.4                    |

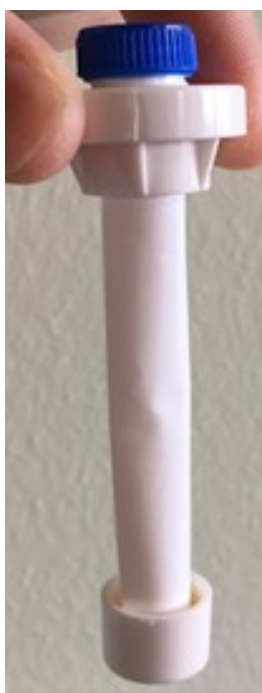

**Figure S1:** The cellulose ester dialysis bag (cylindrical design) used in this study.

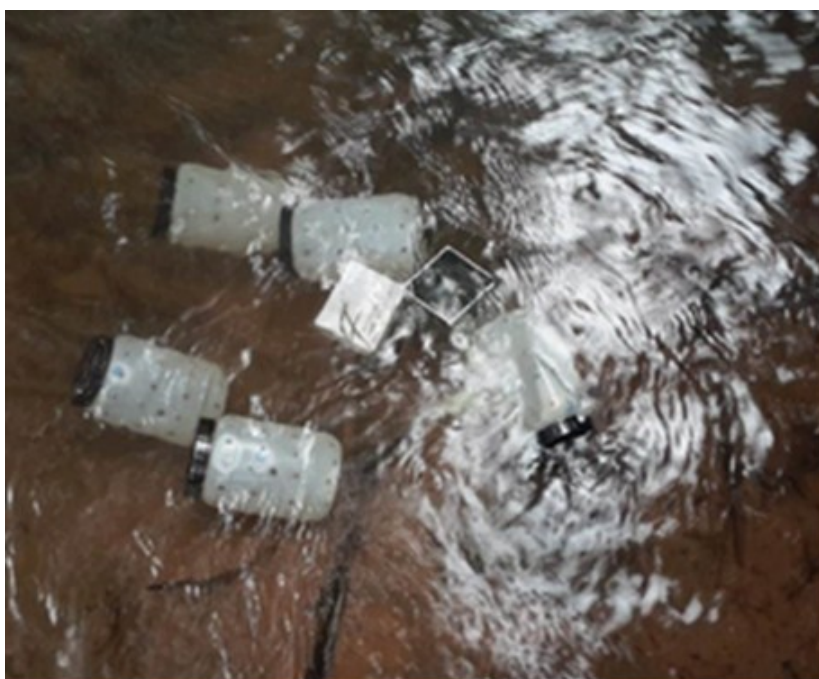

**Figure S2:** The dialysis bags in plastic canisters deployed in the river Queich.

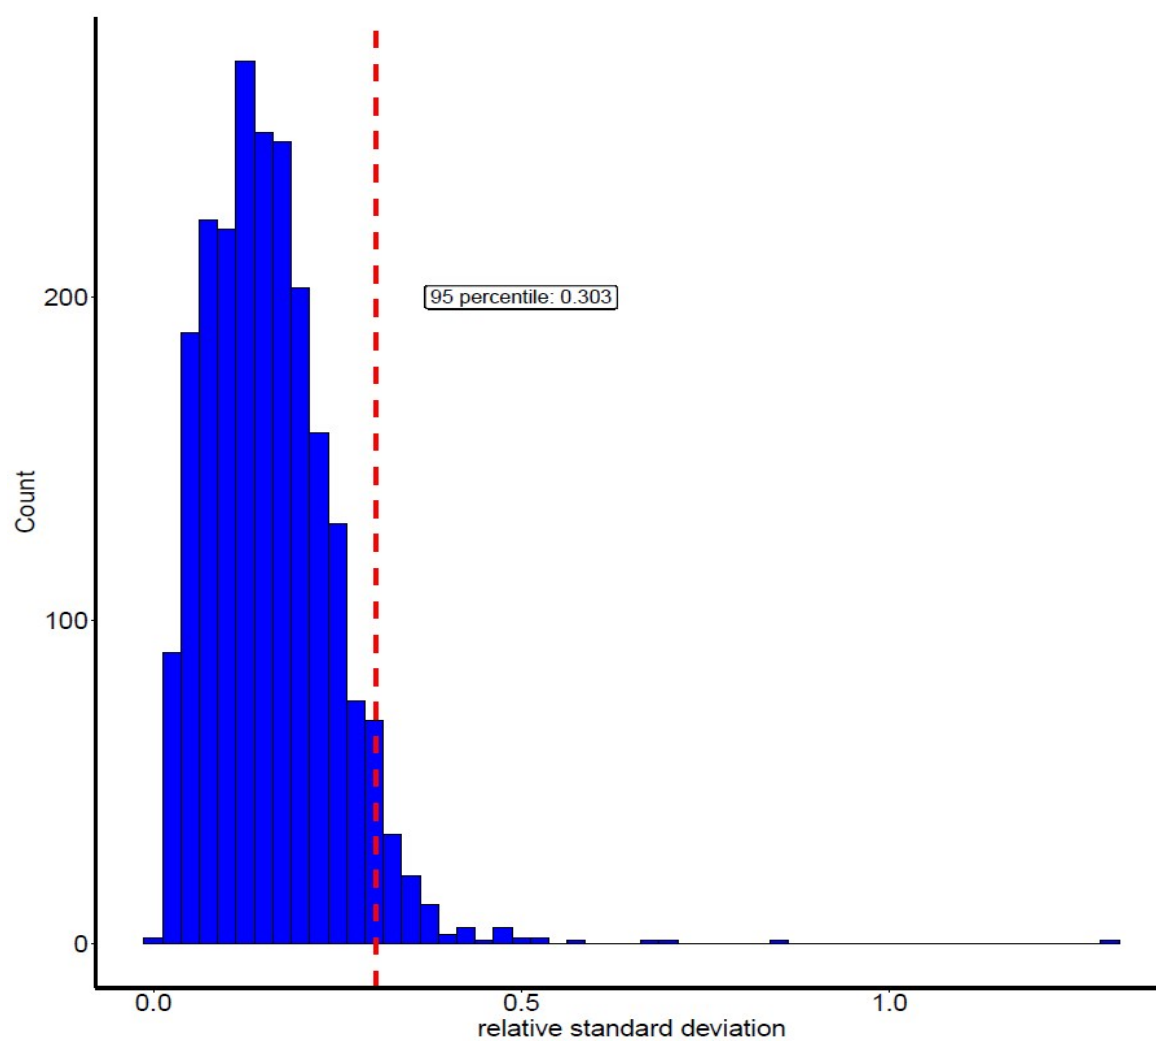

**Figure S3:** Assessment of the instrumental variability based on replicate measurements of SRFA ( $n = 6$ ). Normalized intensity values were used to calculate the relative standard deviation (RSD). 95 % of the RSD values were below 0.303.

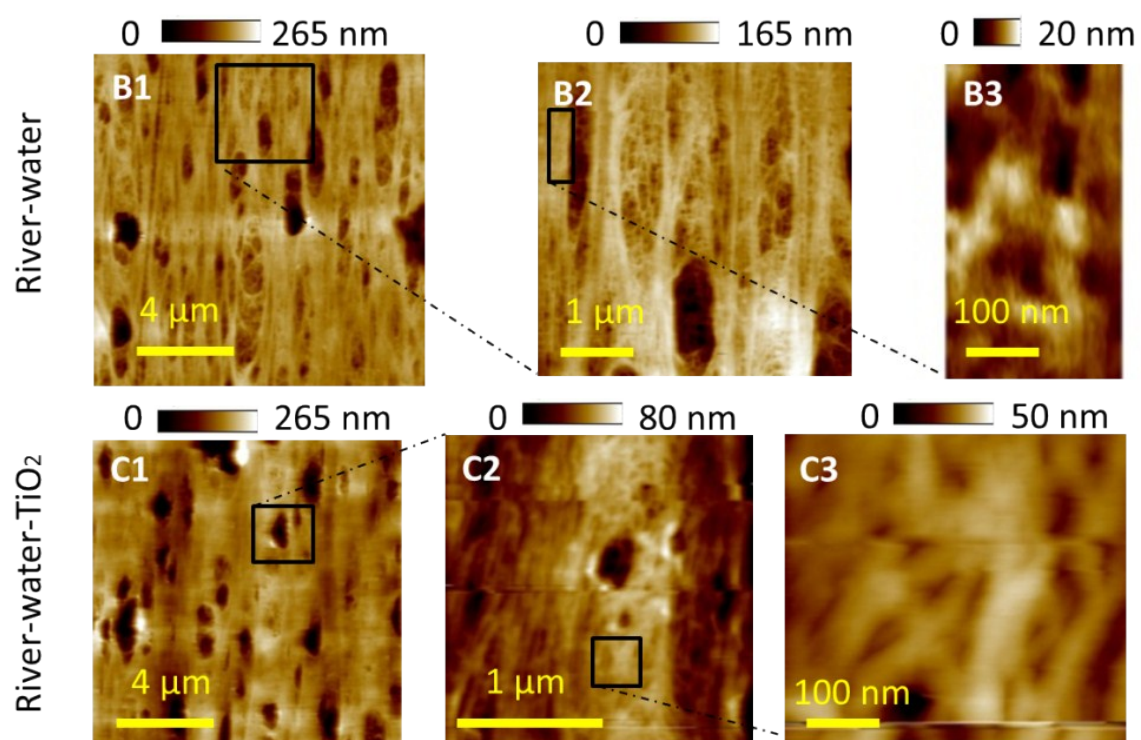

**Figure S4:** AFM height image of the dialysis bag in river water, and river water exposed to n-TiO<sub>2</sub>.

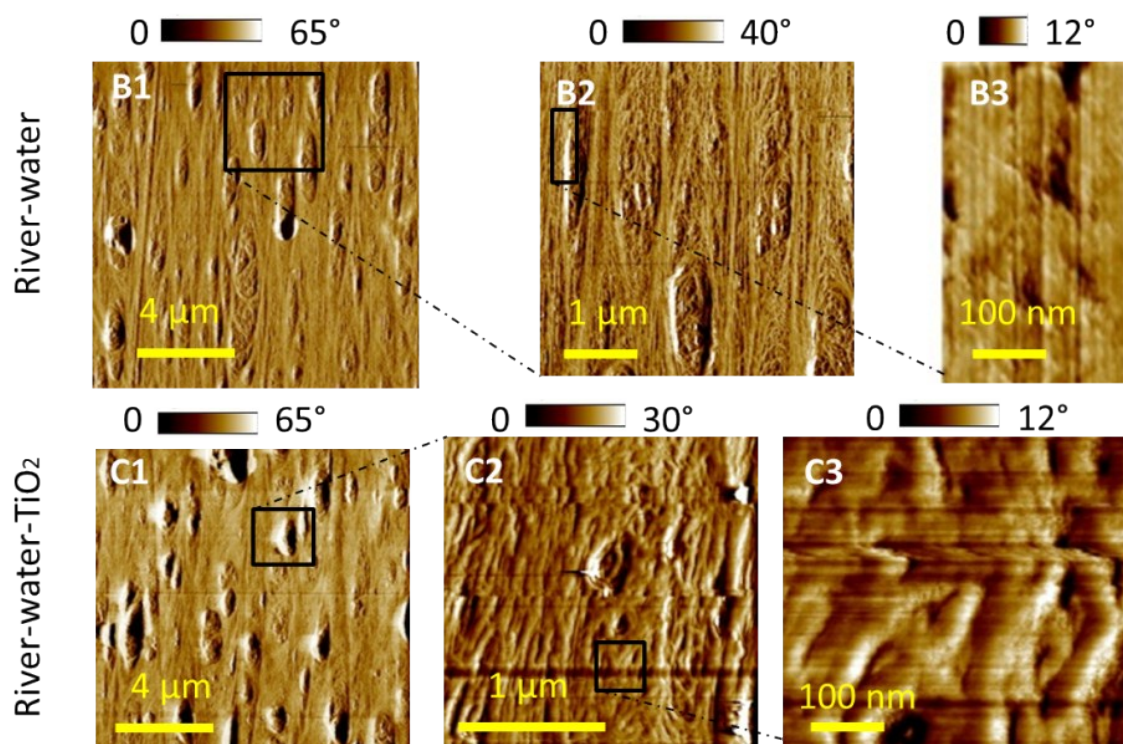

**Figure S5:** AFM phase image of the dialysis bag in river water, and river water exposed to n-TiO<sub>2</sub>.

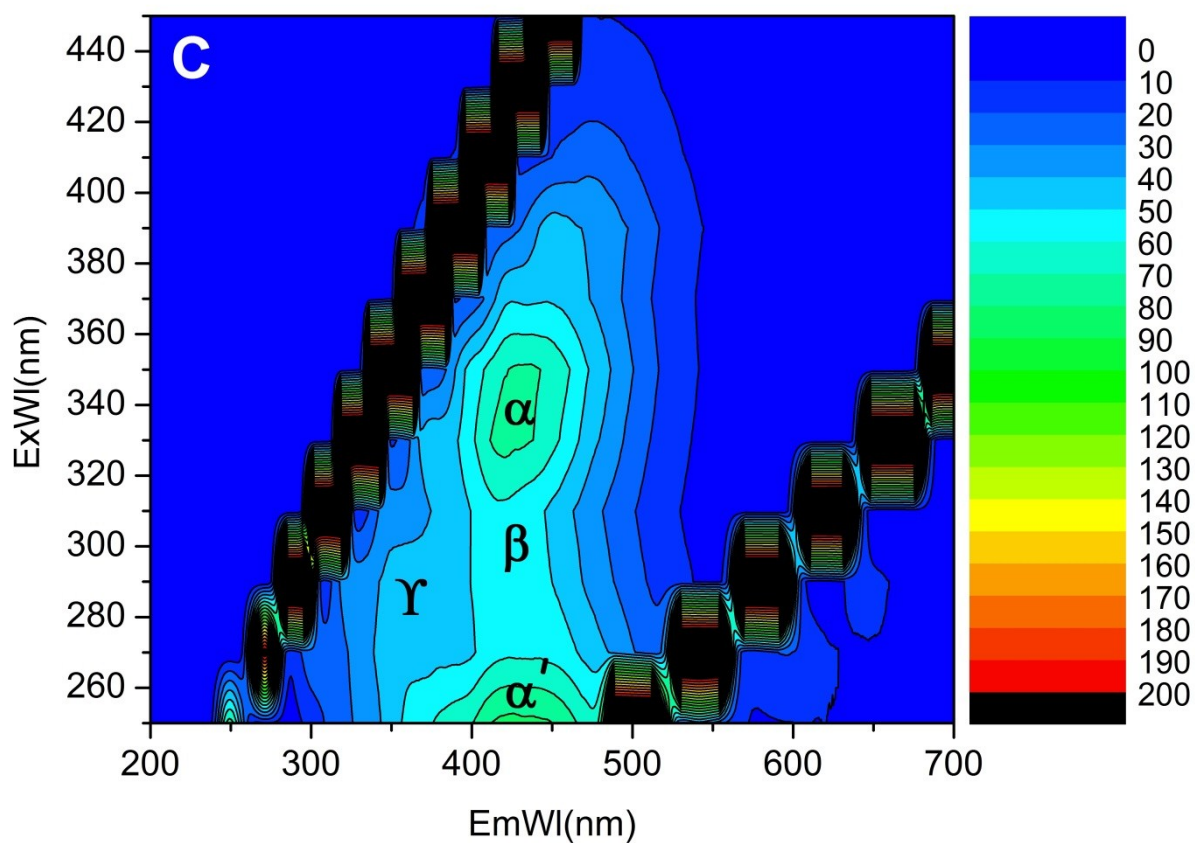

**Figure S6:** Fluorescence EEMs of the samples carried out in the field C) river water inside the dialysis bags with n-TiO<sub>2</sub> (the color scale depicts the intensity a.u.).

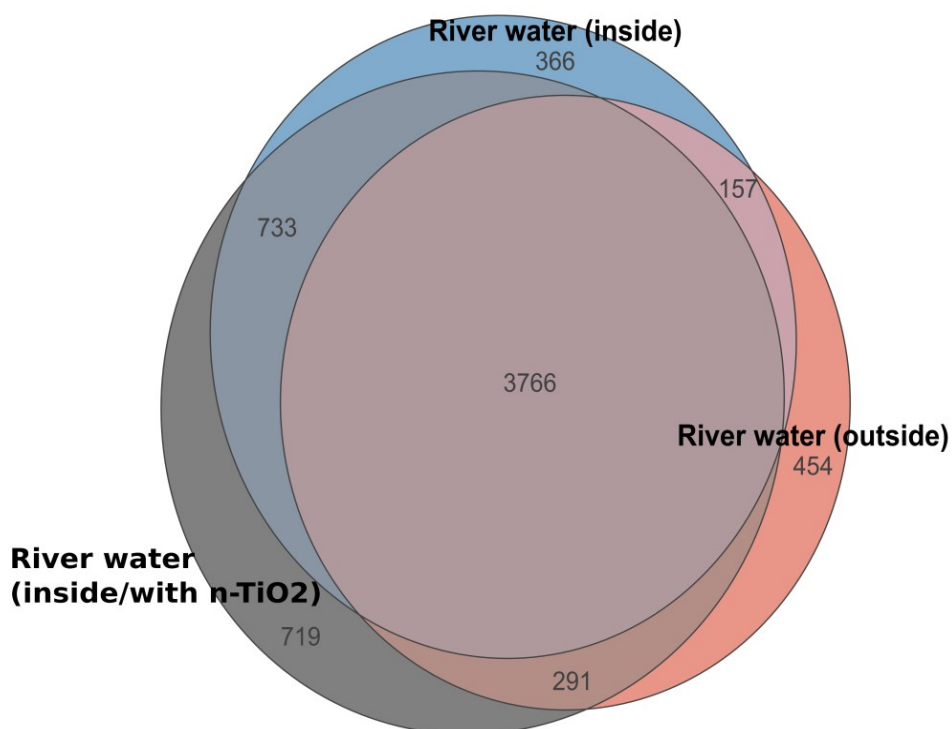

**Figure S7:** Euler diagram depicting the distribution of molecular formulas detected by FT-ICR-MS in all three samples (outside the dialysis bag, and inside the dialysis bag with and without n-TiO<sub>2</sub>) deployed on the field.

**Table S4:** Major compound class distribution of all three samples deployed on the field based on the molecular formulas determined using FT-ICR-MS.

| Sample                      | CHO  | CHNO | CHOS | CHNOS | Other |
|-----------------------------|------|------|------|-------|-------|
| River water (inside)        | 2677 | 1777 | 472  | 91    | 5     |
| %                           | 53.3 | 35.4 | 9.4  | 1.8   | 0.1   |
| River water (outside)       | 2443 | 1565 | 537  | 116   | 7     |
| %                           | 52.3 | 33.5 | 11.5 | 2.5   | 0.1   |
| n-TiO <sub>2</sub> (inside) | 2906 | 1927 | 534  | 138   | 4     |
| %                           | 52.8 | 35.0 | 9.7  | 2.5   | 0.1   |

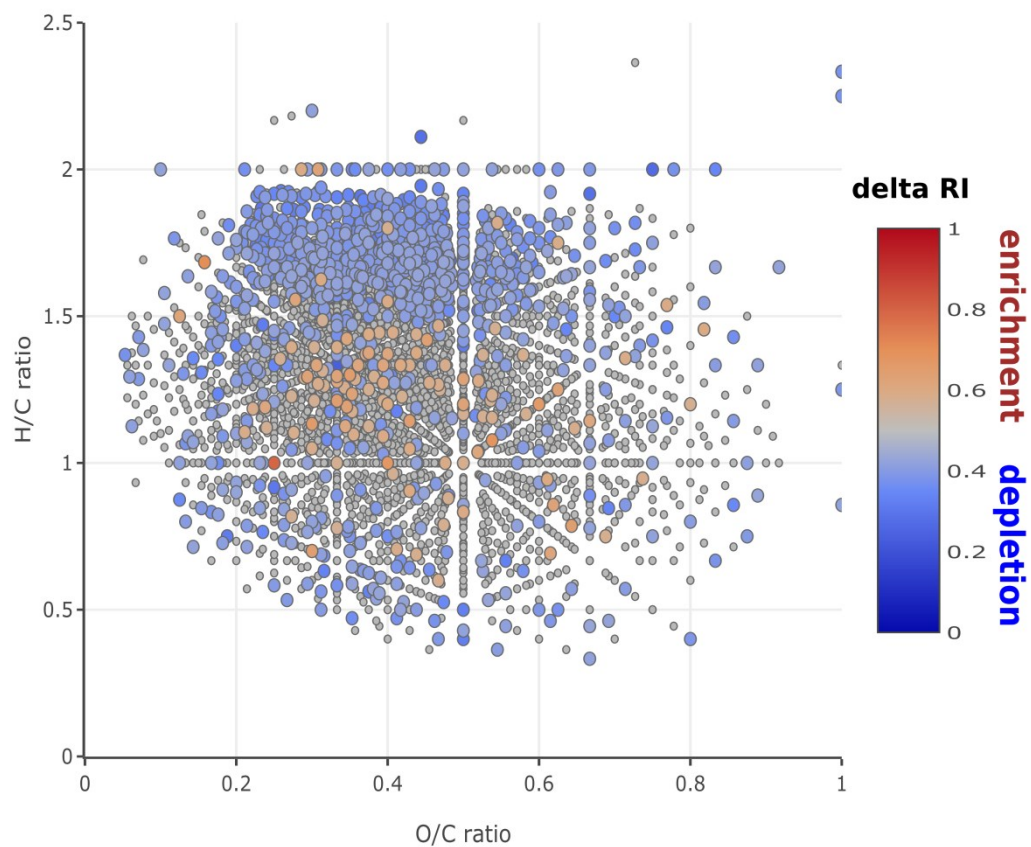

**Figure S8:** Van Krevelen diagram with intensity differences for river water inside the dialysis bags with n-TiO<sub>2</sub> vs without n-TiO<sub>2</sub>.  $\Delta$ RI values below 0.43 (blue) indicate the respective compound is depleted in the river water inside the dialysis bag with n-TiO<sub>2</sub> compared to without n-TiO<sub>2</sub>.

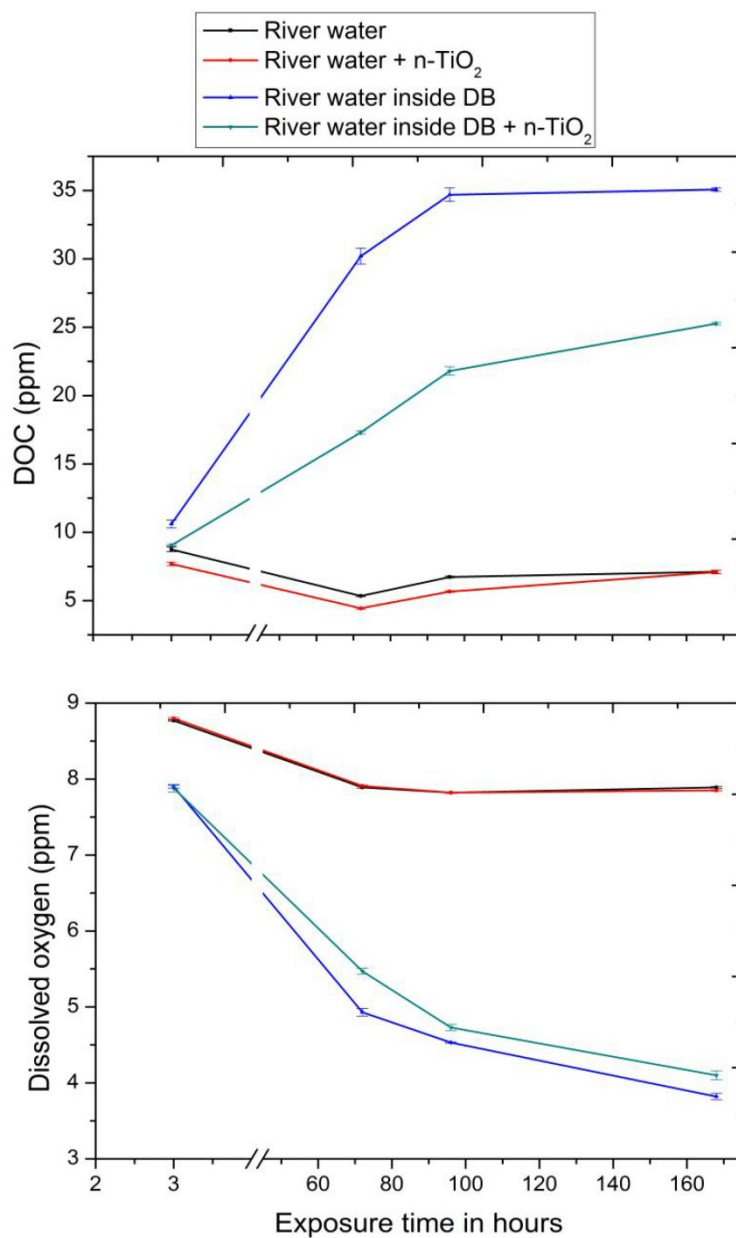

**Figure S9:** DOC and Dissolved oxygen of the river water inside dialysis bags (DB) with and without n-TiO<sub>2</sub>, and the river water as control with and without n-TiO<sub>2</sub> at room temperature (Nov. 2019).

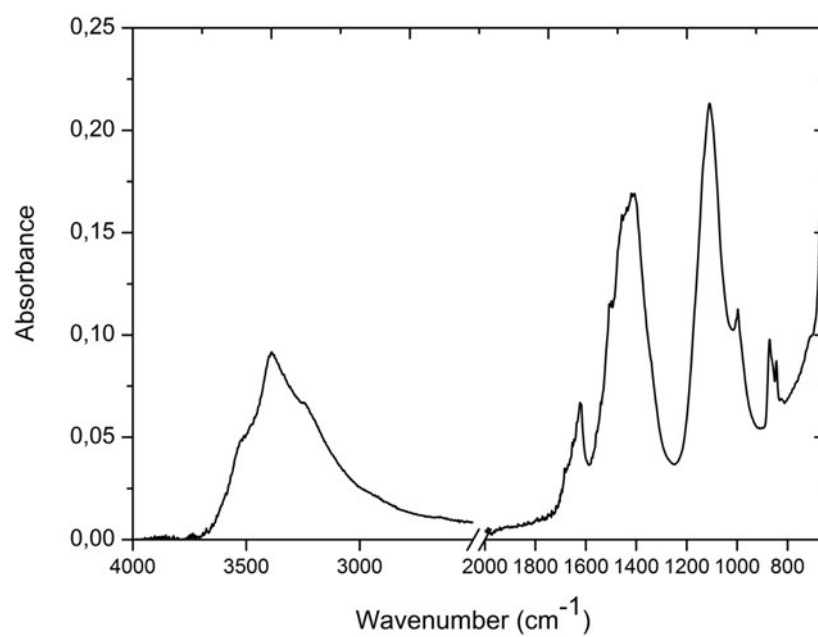

**Figure S10:** ATR-FTIR spectrum of the river water (freeze-dried sample).
